# Supplementary material for: Metal–organic frameworks based on transition-metal carboxylate clusters as secondary building units: synthesis, structures and properties
Source: Royal Society of Chemistry journal article supplement (doi:10.1039/c0ce00315h), 2010-10-21
Supplement: c0ce00315h.pdf [file c0ce00315h.pdf]

## Supporting Information

### **Metal-Organic Frameworks Based on Transition-Metal Oxygen Clusters as Secondary Building Units: Synthesis, Structures and Properties**

Li-Min Zhao, Zhen-Jie Zhang, Shi-Yuan Zhang, Ping Cui, Wei Shi, Bin Zhao, Peng Cheng\*, Dai-Zheng Liao, Shi-Ping Yan

*Department of Chemistry, Nankai University, Tianjin 300071, China*

#### **Catalogue:**

Fig. S1. The plot of TGA of compounds **1-3** and **5**.

Fig. S2. The absorption spectra of compounds **1-3** and **5**.

Table S1. Selected bonds length and angles for compounds **1-5**.

---

\* Corresponding author. E-mail: [pcheng@nankai.edu.cn](mailto:pcheng@nankai.edu.cn).

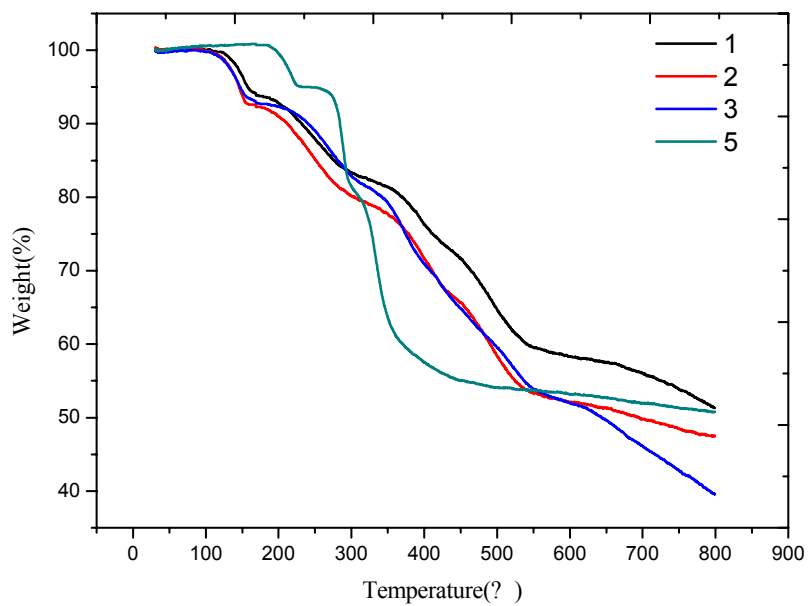

**Fig. S1.** The TGA digram for compounds 1-3 and 5.

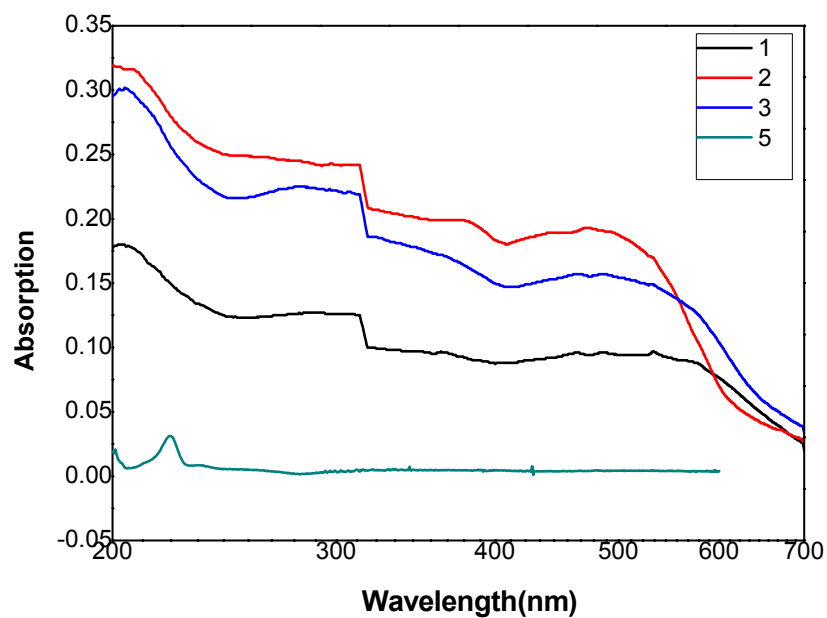

**Fig. S2.** The absorption spectra of compounds 1-3 and 5.

**Table S1. Selected bonds length and angles for compounds 1-5.**

| 1                   |            | 2                     |            | 3                    |            |
|---------------------|------------|-----------------------|------------|----------------------|------------|
| Zn(1)-O(9)          | 1.897(3)   | O(7)-Zn(2)#1          | 2.225(5)   | Cd(1)-O(2)           | 2.182(5)   |
| Zn(1)-O(10)         | 1.919(3)   | Zn(1)-O(1)            | 1.957(5)   | Cd(1)-O(3)#1         | 2.229(6)   |
| Zn(1)-O(8)          | 2.015(5)   | Zn(1)-O(3)#2          | 1.984(5)   | Cd(1)-N(3)           | 2.292(6)   |
| Zn(1)-N(1)          | 2.031(6)   | Zn(1)-N(1)            | 2.070(6)   | Cd(1)-O(9)           | 2.322(6)   |
| Zn(3)-O(10)# 1      | 1.917(3)   | Zn(1)-O(8)            | 2.174(5)   | Cd(1)-N(1)           | 2.397(7)   |
| Zn(3)-O(2)          | 1.951(6)   | Zn(1)-N(5)            | 2.235(6)   | Cd(1)-O(1)           | 2.706(6)   |
| Zn(3)-N(5)          | 2.024(7)   | Zn(2)-N(4)#3          | 2.080(5)   | Cd(2)-N(6)#3         | 2.256(6)   |
| Zn(3)-O(1)          | 2.089(3)   | Zn(2)-N(4)            | 2.080(5)   | Cd(2)-O(7)           | 2.331(6)   |
| Zn(3)-O(3)          | 2.445(9)   | Zn(2)-O(9)#3          | 2.146(5)   | Cd(2)-O(8)           | 2.359(6)   |
| Zn(2)-O(9)#2        | 1.944(3)   | Zn(2)-O(9)            | 2.146(5)   | Cd(2)-O(7)           | 2.331(6)   |
| Zn(2)-O(9)          | 1.944(3)   | Zn(2)-O(7)#4          | 2.225(5)   |                      |            |
| Zn(2)-N(4)#3        | 2.211(6)   | Zn(2)-O(7)#5          | 2.225(5)   |                      |            |
| Zn(2)-N(4)#4        | 2.211(6)   |                       |            |                      |            |
| Zn(2)-O(7)          | 2.217(3)   |                       |            |                      |            |
| Zn(2)-O(7)#2        | 2.217(3)   |                       |            |                      |            |
| O(9)-Zn(1)-O(10)    | 109.15(14) | S(1)-O(7)-Zn(2)#1     | 156.2(3)   | O(2)-Cd(1)-O(3)#1    | 118.3(2)   |
| O(9)-Zn(1)-O(8)     | 114.00(17) | O(1)-Zn(1)-O(3)#2     | 113.8(2)   | O(2)-Cd(1)-N(3)      | 149.2(2)   |
| O(10)-Zn(1)-O(8)    | 105.10(18) | O(1)-Zn(1)-N(1)       | 146.9(2)   | O(3)#1-Cd(1)-N(3)    | 92.3(3)    |
| O(9)-Zn(1)-N(1)     | 112.5(2)   | O(3)#2-Zn(1)-N(1)     | 99.0(2)    | O(2)-Cd(1)-O(9)      | 91.0(2)    |
| O(10)-Zn(1)-N(1)    | 108.9(2)   | O(1)-Zn(1)-O(8)       | 87.21(19)  | N(3)-Cd(1)-O(9)      | 83.1(2)    |
| O(8)-Zn(1)-N(1)     | 106.8(2)   | O(3)#2-Zn(1)-O(8)     | 95.6(2)    | O(3)#1-Cd(1)-N(1)    | 100.3(3)   |
| O(10)#1-Zn(3)-O(2)  | 129.5(2)   | N(1)-Zn(1)-O(8)       | 85.5(2)    | N(3)-Cd(1)-N(1)      | 85.6(2)    |
| O(10)#1-Zn(3)-N(5)  | 104.0(2)   | O(1)-Zn(1)-N(5)       | 91.3(2)    | O(2)-Cd(1)-O(1)      | 51.80(18)  |
| O(2)-Zn(3)-N(5)     | 115.7(3)   | O(3)#2-Zn(1)-N(5)     | 97.7(2)    | O(9)-Cd(1)-O(1)      | 83.5(2)    |
| O(10)#1-Zn(3)-O(1)  | 103.56(14) | N(1)-Zn(1)-N(5)       | 88.3(2)    | N(1)-Cd(1)-O(1)      | 84.7(2)    |
| O(10)#1-Zn(3)-O(3)  | 93.8(2)    | N(4)#3-Zn(2)-O(9)#3   | 88.4(2)    | O(3)#1-Cd(1)-O(4)#1  | 49.5(2)    |
| O(2)-Zn(3)-O(3)     | 58.4(3)    | N(4)-Zn(2)-O(9)#3     | 91.6(2)    | N(3)-Cd(1)-O(4)#1    | 135.4(2)   |
| N(5)-Zn(3)-O(3)     | 89.6(3)    | N(4)#3-Zn(2)-O(9)     | 91.6(2)    | O(9)-Cd(1)-O(4)#1    | 116.4(2)   |
| O(1)-Zn(3)-O(3)     | 154.00(18) | N(4)-Zn(2)-O(9)       | 88.4(2)    | N(1)-Cd(1)-O(4)#1    | 81.0(2)    |
| O(9)#2-Zn(2)-N(4)#3 | 92.38(18)  |                       |            | O(2)-Cd(1)-C(8)#1    | 96.5(2)    |
| 4                   |            |                       |            |                      |            |
| Cd(1)-O(9)#1        | 2.264(4)   | O(9)#1-Cd(1)-O(9)#2   | 180.00(7)  | O(11)-Cd(3)-O(10)#10 | 81.30(13)  |
| Cd(1)-O(11)         | 2.281(3)   | O(9)#1-Cd(1)-O(11)#3  | 82.03(10)  | O(11)#10-Cd(3)-O(3)  | 79.38(9)   |
| Cd(2)-O(2)          | 2.222(4)   | O(9)#2-Cd(1)-O(11)#3  | 97.97(10)  | O(8)#11-Cd(3)-O(3)   | 174.84(14) |
| Cd(2)-O(7)#9        | 2.252(3)   | O(11)#3-Cd(1)-O(11)#4 | 90.91(17)  | O(9)-Cd(4)-O(7)      | 94.34(13)  |
| Cd(2)-O(7)          | 2.293(3)   | O(11)-Cd(1)-O(11)#4   | 89.09(17)  | O(9)-Cd(4)-O(11)#2   | 83.61(13)  |
| Cd(3)-O(11)         | 2.224(3)   | O(2)-Cd(2)-O(7)#8     | 101.76(10) | O(7)-Cd(4)-O(11)#2   | 171.99(11) |
| Cd(3)-O(11)#10      | 2.224(3)   | O(7)#8-Cd(2)-O(7)#9   | 103.20(15) | O(9)-Cd(4)-O(8)      | 100.27(11) |
| Cd(3)-O(10)         | 2.375(3)   | O(2)-Cd(2)-O(7)#10    | 102.28(10) | O(7)-Cd(4)-O(8)      | 95.54(12)  |
| Cd(3)-O(3)          | 2.462(4)   | O(7)#8-Cd(2)-O(7)#10  | 155.50(3)  | O(9)-Cd(4)-O(1)      | 81.44(11)  |

|              |          |                      |            |
|--------------|----------|----------------------|------------|
| Cd(4)-O(9)   | 2.228(3) | O(7)#9-Cd(2)-O(7)#10 | 76.32(12)  |
| Cd(4)-O(7)   | 2.243(3) | O(11)-Cd(3)-O(8)#11  | 103.46(10) |
| Cd(4)-O(8)   | 2.266(3) | O(11)-Cd(3)-O(8)#11  | 103.46(10) |
| Cd(4)-O(4)#2 | 2.354(3) | O(11)-Cd(3)-O(10)    | 159.09(13) |

5

|               |            |                    |           |                       |          |
|---------------|------------|--------------------|-----------|-----------------------|----------|
| Cu(1)-O(2)    | 1.9307(18) | O(2)-Cu(1)-O(10)   | 96.61(7)  | O(12)#3-Cu(2)-Cu(1)#3 | 39.56(5) |
| Cu(1)-O(2)    | 1.9307(18) | O(2)-Cu(1)-O(12)   | 169.54(9) | O(1)-Cu(3)-O(9)#5     | 84.43(8) |
| Cu(1)-O(13)   | 1.9707(19) | O(2)-Cu(1)-O(13)   | 86.51(8)  | O(1)-Cu(3)-O(9)#1     | 99.75(9) |
| Cu(1)-Cu(2)#1 | 3.0410(5)  | O(12)-Cu(1)-O(13)  | 89.91(8)  |                       |          |
| Cu(2)-O(8)    | 1.946(2)   | O(10)-Cu(1)-O(11)  | 86.48(7)  |                       |          |
| Cu(2)-O(12)#3 | 1.9887(17) | O(8)-Cu(2)-O(12)#2 | 159.21(8) |                       |          |
| Cu(2)-O(10)#3 | 2.2841(18) | O(8)-Cu(2)-O(10)#3 | 101.78(8) |                       |          |
| Cu(3)-O(10)   | 1.9015(18) | O(8)-Cu(2)-Cu(1)#3 | 86.68(6)  |                       |          |
| Cu(3)-O(1)    | 1.9463(19) | O(10)-Cu(3)-O(1)   | 93.59(8)  |                       |          |

**Symmetry transformations used to generate equivalent atoms:**

- #1  $x, y-1, z$  #2  $-x+1, -y+1, -z$  #3  $x, y, z-1$  #4  $-x+1, -y+1, -z+1$  #5  $x, y+1, z$   
 #6  $x, y, z+1$  #7  $-x+2, -y-1, -z-1$
- #1  $x-1, y+1, z-1$  #2  $x, y-1, z$  #3  $-x+2, -y, -z+2$  #4  $-x+1, -y+1, -z+1$  #5  $x+1, y-1, z+1$   
 #6  $-x, y, -z+1/2$  #7  $x, y+1, z$
- #1  $x, y+1, z$  #2  $-x+1, -y, -z+1$  #3  $x-1, y-1, z-1$  #4  $-x, -y-1, -z$  #5  $x, y-1, z$   
 #6  $-x, y, -z+1/2$  #7  $x+1, y+1, z+1$
- #1  $x-1/2, y-1/2, z-1$  #2  $-x+3/2, -y+3/2, -z+1$  #3  $-x+1, -y+1, -z$  #4  $-x+1, y, -z$  #5  $x, -y+1, z$   
 #6  $x-1/2, -y+3/2, z-1$  #7  $-x+3/2, y-1/2, -z+1$  #8  $-x+3/2, -y+3/2, -z+2$  #9  $-x+3/2, y+1/2, -z+2$   
 #10  $x, -y+2, z$  #11  $x-1/2, y+1/2, z-1$
- #1  $x+1, y-1, z$  #2  $-x+1, -y+1, -z$  #3  $x-1, y+1, z$  #4  $-x, -y+2, -z$  #5  $-x+1, -y+1, -z+1$
